# Supplementary material
Source: MDPI journal article supplement (https://www.mdpi.com/2075-4701/11/7/1064)
Supplement: s1 [file s1 › metals-1278662-supplementary.pdf]

# Supplementary of Fatigue Performance of an Additively Manufactured Zr-Based Bulk Metallic Glass and the Effect of Post-Processing

Navid Sohrabi <sup>1,\*</sup>, Milad Hamidi-Nasab <sup>1,2</sup>, Baptiste Rouxel <sup>1</sup>, Jamasp Jhabvala <sup>1</sup>, Annapaola Parrilli <sup>3</sup>, Maurizio Vedani <sup>2</sup> and Roland E. Logé <sup>1</sup>

<sup>1</sup> Thermomechanical Metallurgy Laboratory (LMTM), PX Group Chair, Ecole Polytechnique Fédérale de Lausanne (EPFL), 2002 Neuchâtel, Switzerland; milad.hamidinasab@epfl.ch (M.H.-N.); baptiste.rouxel@epfl.ch (B.R.); jamasp.jhabvala@epfl.ch (J.J.); roland.loge@epfl.ch (R.E.L.)

<sup>2</sup> Department of Mechanical Engineering, Politecnico di Milano, 20156 Milan, Italy; maurizio.vedani@polimi.it

<sup>3</sup> Center for X-ray Analytics, Swiss Federal Laboratories for Materials Science and Technology (Empa), Überlandstrasse 129, 8600 Dübendorf, Switzerland; annapaola.parrilli@empa.ch

\* Correspondence: navid.sohrabi@epfl.ch

**Citation:** Sohrabi, N.; Hamidi-Nasab, M.; Rouxel, B.; Jhabvala, J.; Parrilli, A.; Vedani, M.; Logé, R.E. Fatigue Performance of An Additively Manufactured Zr-Based Bulk Metallic Glass and the Effect of Post-Processing. *Metals* **2021**, *11*, 1064. <https://doi.org/10.3390/met11071064>

Academic Editor(s): Marco Mando-  
lini

Received: 13 June 2021

Accepted: 28 June 2021

Published: 1 July 2021

**Publisher's Note:** MDPI stays neutral with regard to jurisdictional claims in published maps and institutional affiliations.

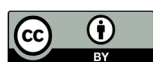

**Copyright:** © 2021 by the authors. Submitted for possible open access publication under the terms and conditions of the Creative Commons Attribution (CC BY) license (<http://creativecommons.org/licenses/by/4.0/>).

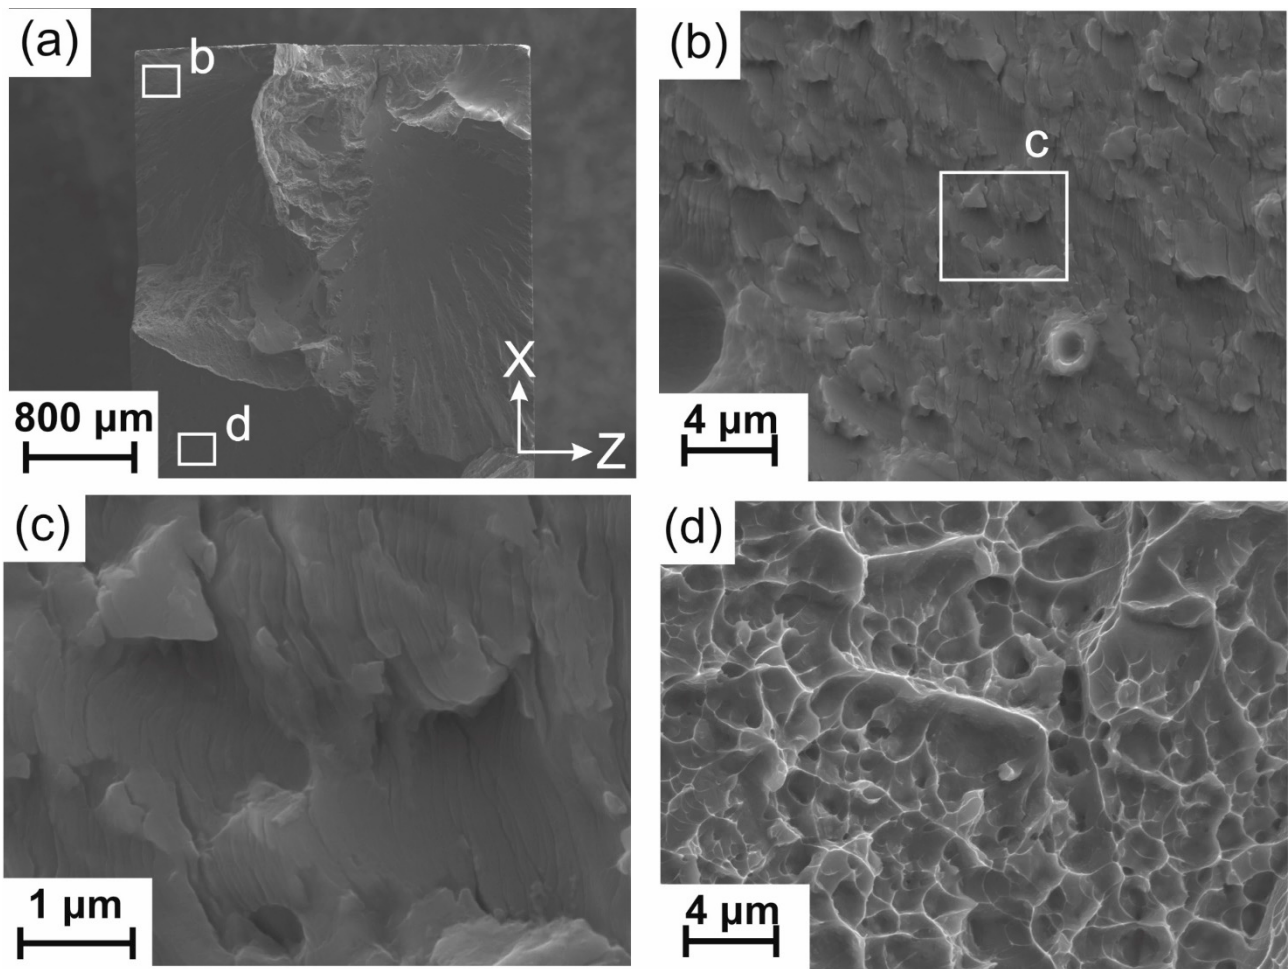

**Figure S1.** (a) Macroscopic image of the fracture surface of a sample tested at 200 MPa, (b) higher magnification image of region b in (a), (c) higher magnification image of (b) showing striation patterns, and (d) higher magnification image of region d in (a) shows dimple-like patterns as a result of rapid fracture.

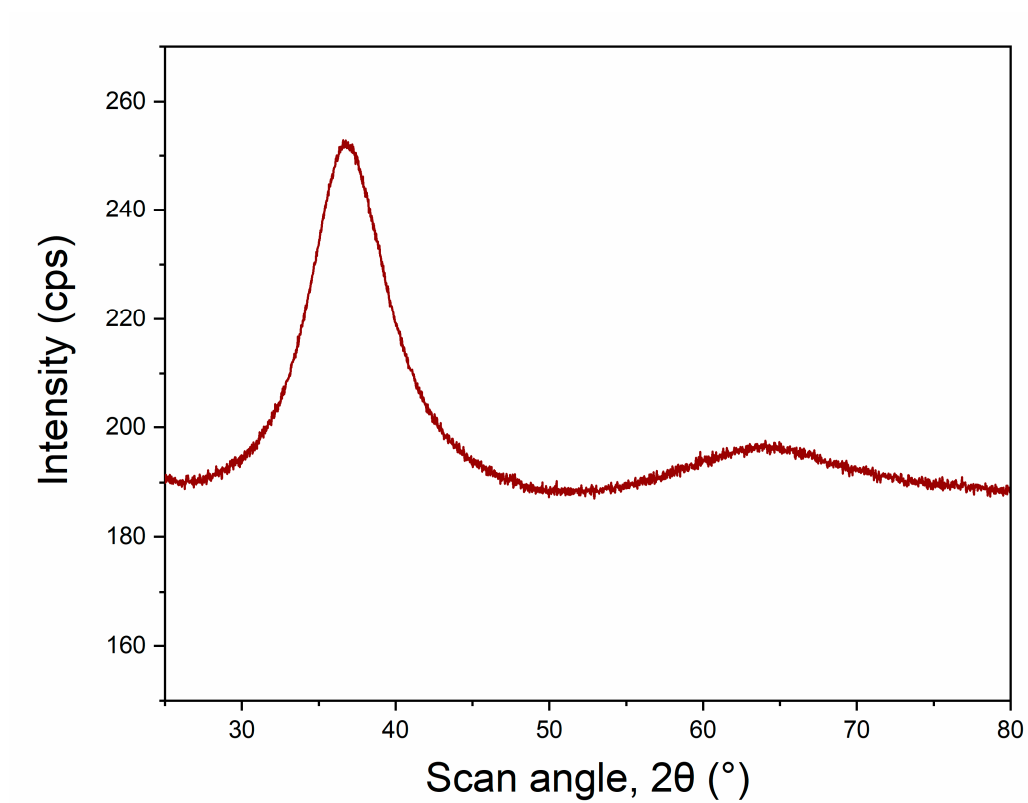

**Figure S2.** XRD pattern of laser shock peened (LSPed) sample from X-Z cross-section.

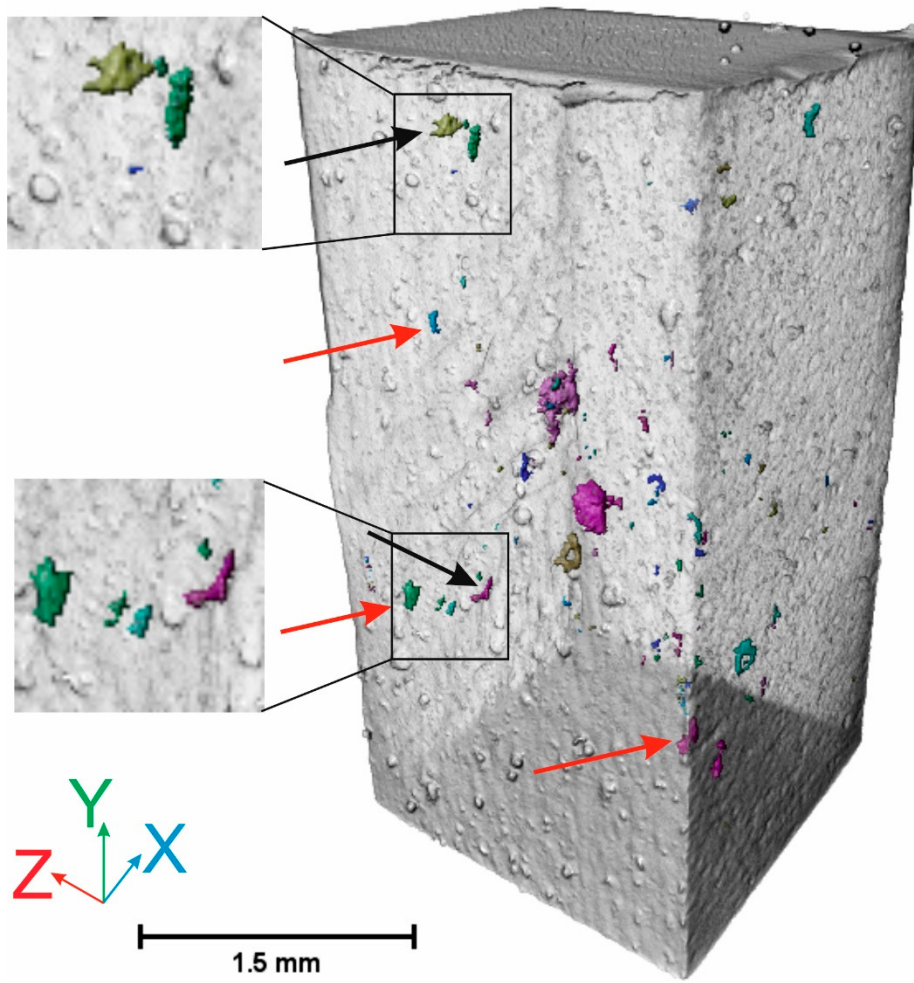

**Figure S3.** 3D constructed image of an LPBF sample (as-built without any post-processing), where Z-axis is the build direction of a sample fabricated horizontally and the force was applied in the X direction. Black arrows highlight LoFs oriented in X-direction (or horizontal orientation) and red arrows highlight LoFs oriented in Y-direction (or vertical orientation).
